DECEMBER 2022 | VOLUME 179 | NUMBER 12

# The American Journal of Psychiatry

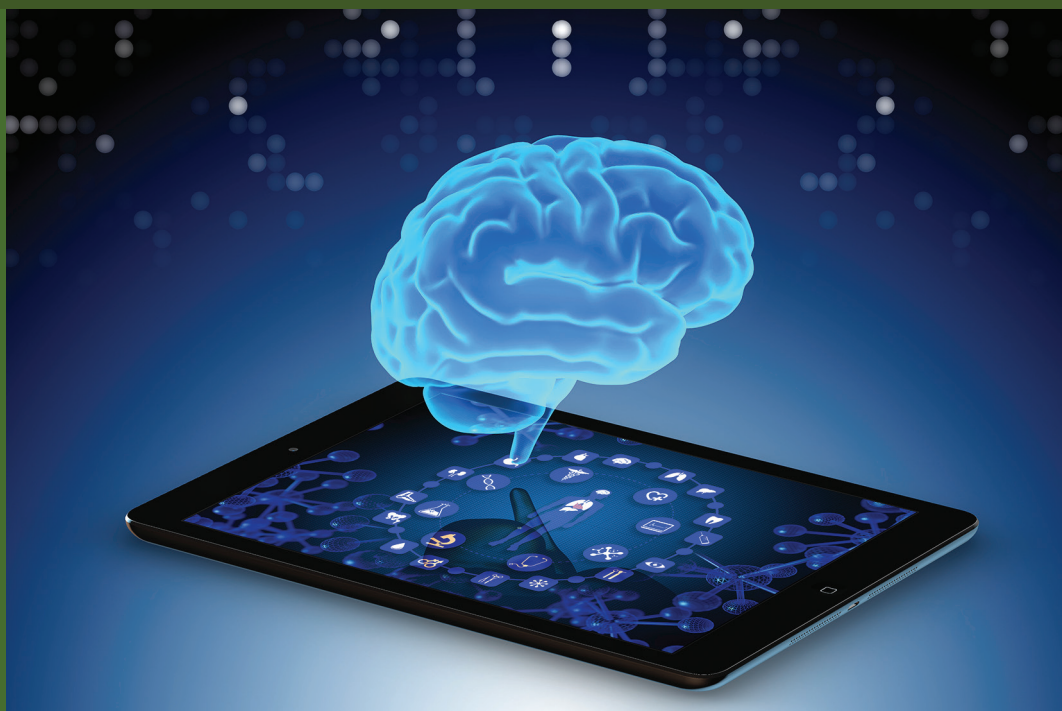

Technology and Mental Health: State of the Art for  
Assessment and Treatment

Effectiveness of Antipsychotic Use for Reducing  
Risk of Work Disability

Efficacy of fMRI Neurofeedback on Clinical and  
Cognitive Measures in Children With ADHD

A Novel, Brief, Fully Automated Intervention to Extend  
the Antidepressant Effect of a Single Ketamine Infusion

AMERICAN  
**PSYCHIATRIC**  
ASSOCIATION

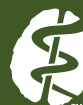

[ajp.psychiatryonline.org](http://ajp.psychiatryonline.org)
